# Supplementary material for: The miR-532-E2F1 feedback loop contributes to gastric cancer progression
Source: PubMed Central journal article supplement (PMC9018701; doi:10.1038/s41419-022-04832-7), 2022-04-19

**Fig.1**

**1-7**

**E2F1**

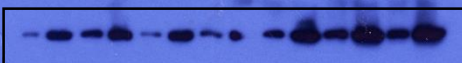

**GAPDH**

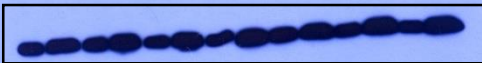

**15-21**

**E2F1**

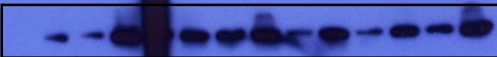

**GAPDH**

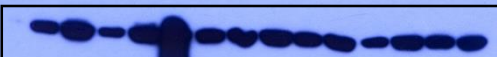

**8-14**

**E2F1**

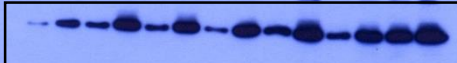

**GAPDH**

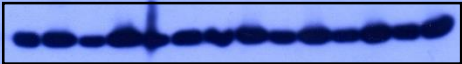

**Fig.2**

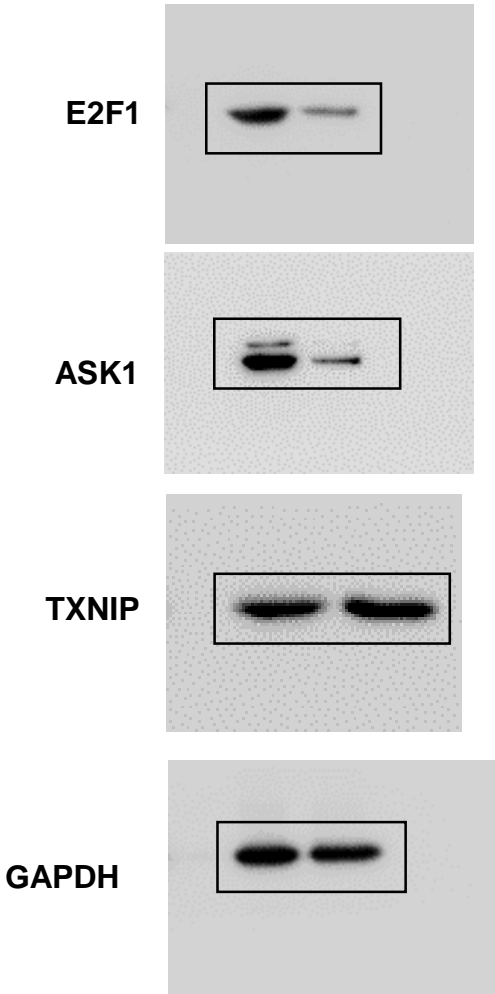

**Fig.4**

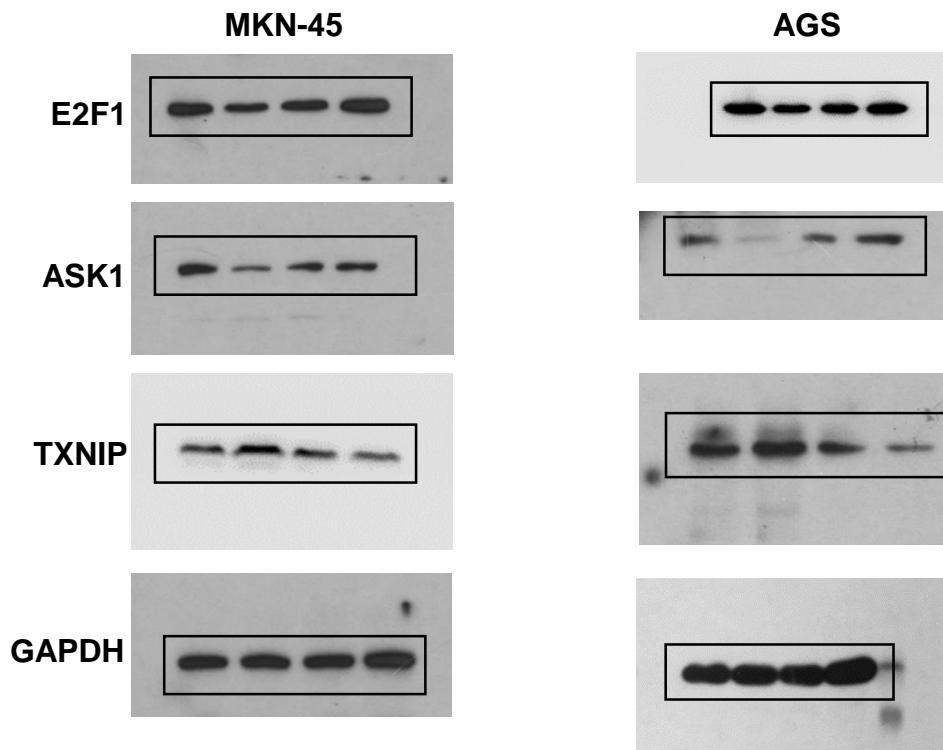

**Fig.4**

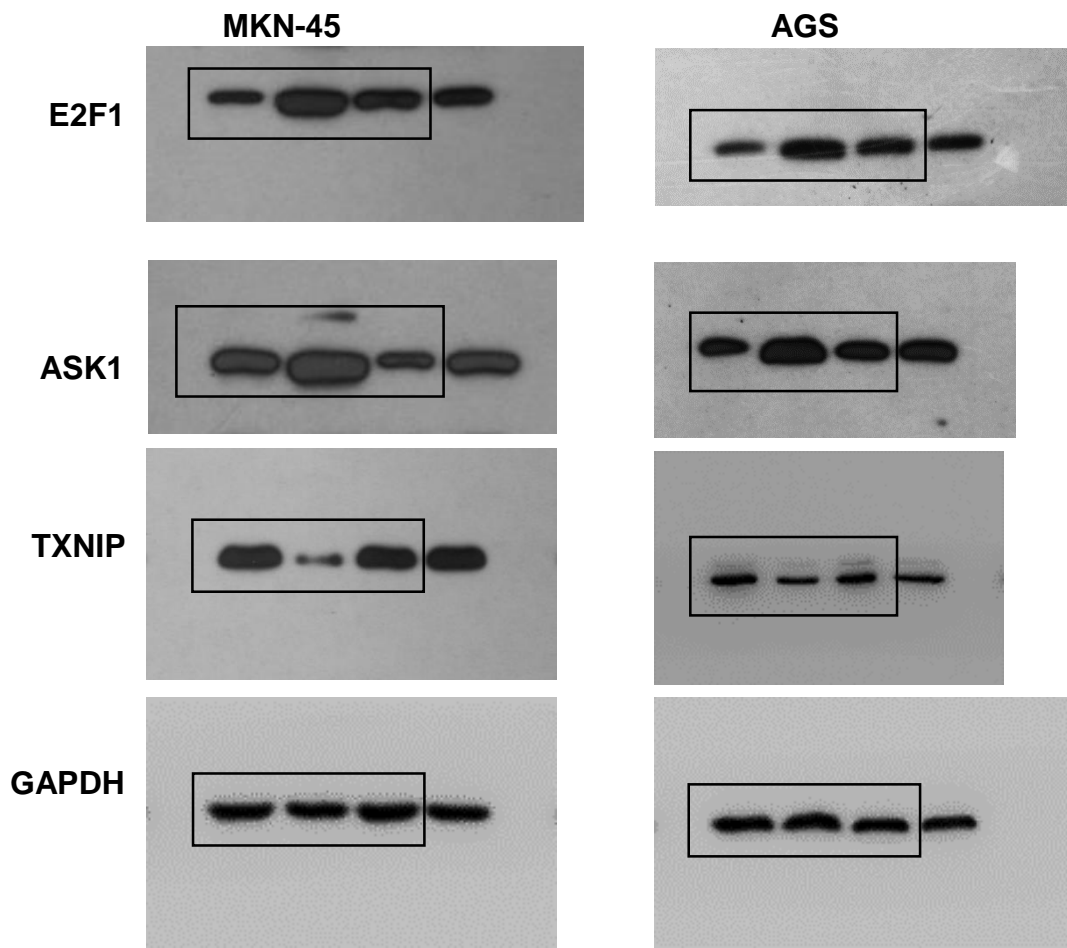

**Fig.6**

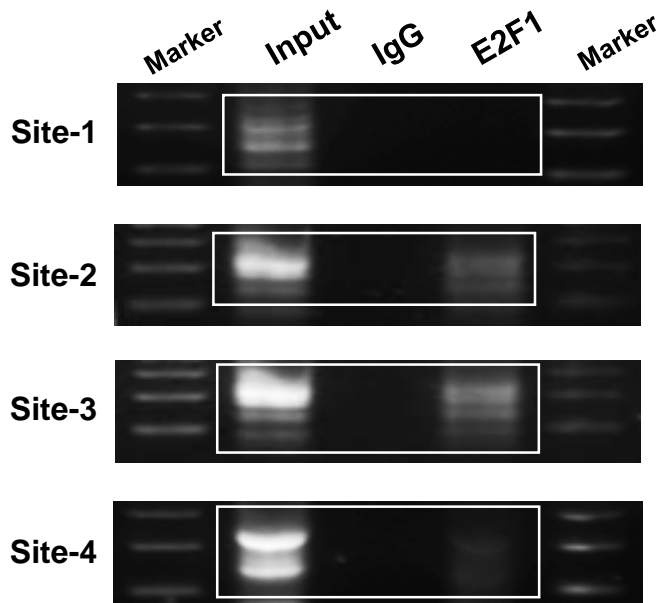

**Fig.7**

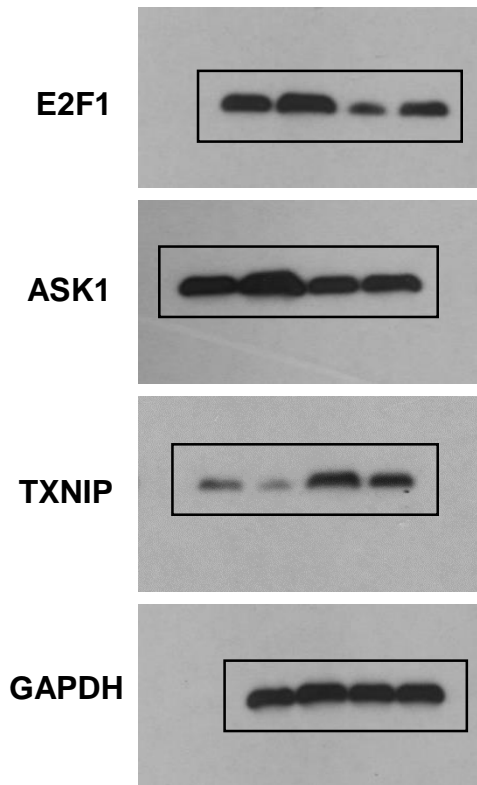

**sFig.1**

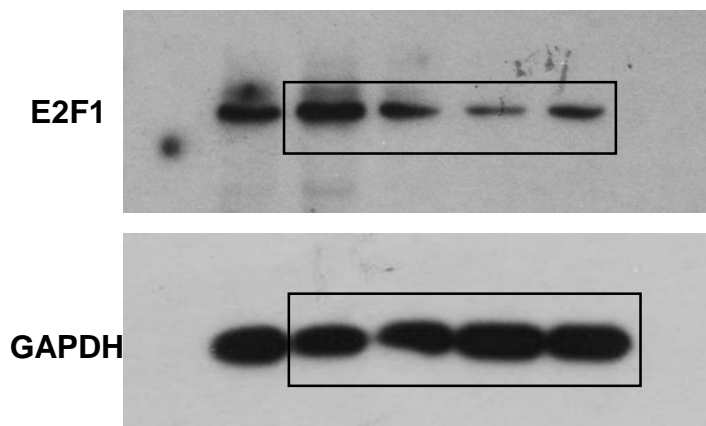

**sFig.1**

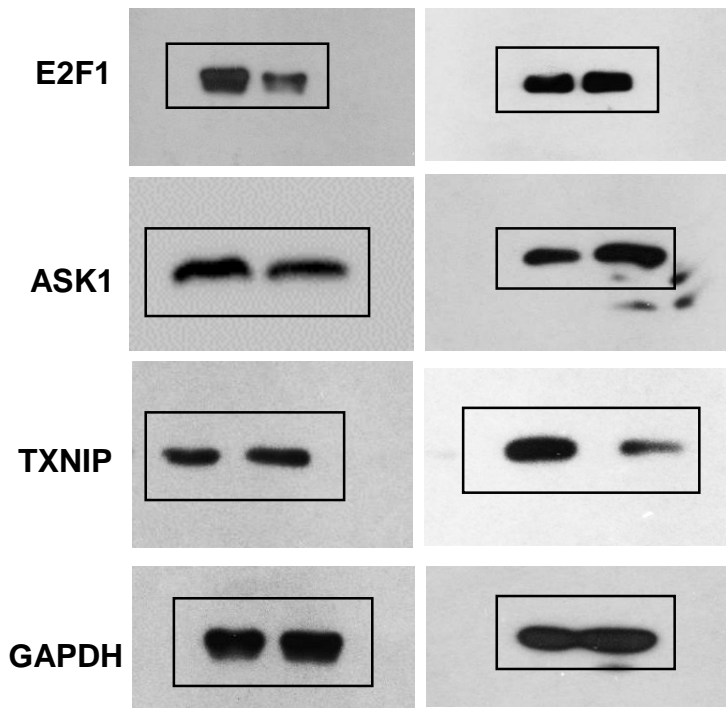



**sFig.2**

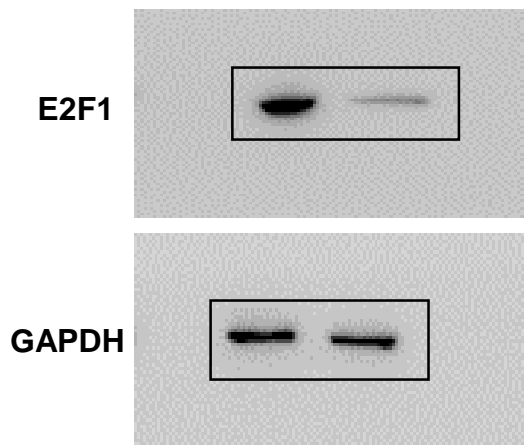

**sFig.6**

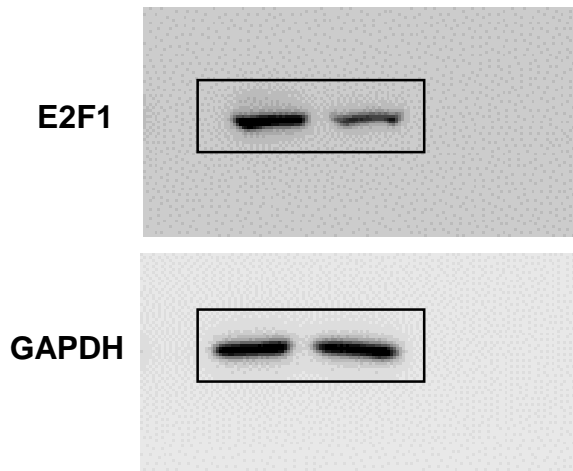

Supplement: 41419_2022_4832_MOESM2_ESM.pdf [file 41419_2022_4832_MOESM2_ESM.pdf]
