# Supplementary material for: The miR-532-E2F1 feedback loop contributes to gastric cancer progression
Source: PubMed Central journal article supplement (PMC9018701; doi:10.1038/s41419-022-04832-7), 2022-04-19
Supplement: 41419_2022_4832_MOESM1_ESM.pdf [file 41419_2022_4832_MOESM1_ESM.pdf]

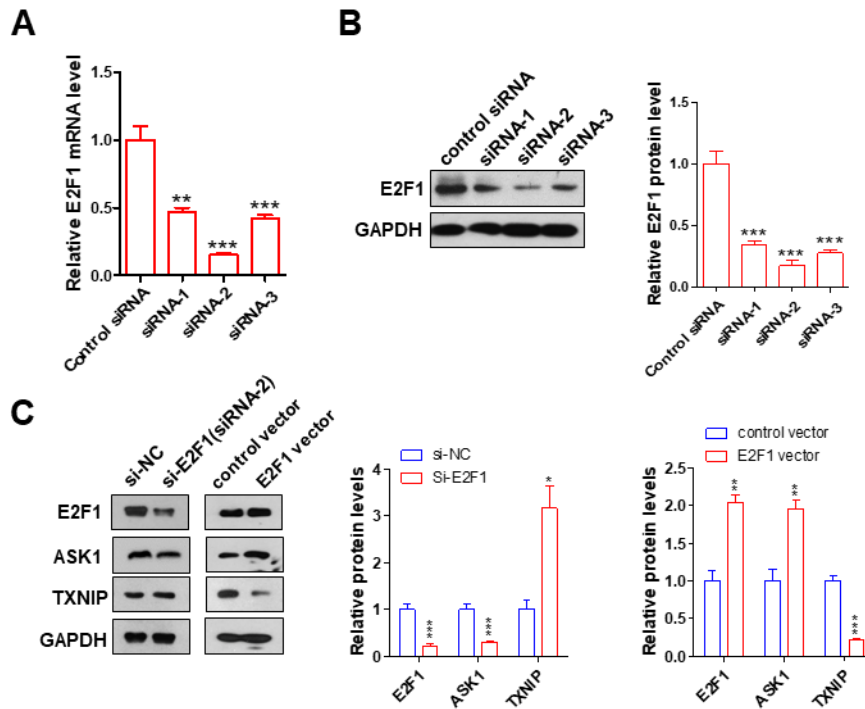

**Supplementary Fig.1 The efficiencies of siRNA and overexpression vector of E2F1.** (A) qRT-PCR analysis of E2F1 mRNA levels normalized to GAPDH in MKN-45 cells transfected with control siRNA, E2F1 siRNA-1, E2F1 siRNA-2 and E2F1 siRNA-3. (B) Western blotting analysis of E2F1 protein levels in MKN-45 cells transfected with control siRNA, E2F1 siRNA-1, E2F1 siRNA-2 and E2F1 siRNA-3. GAPDH served as the loading control. (C) Western blotting analysis of E2F1, ASK1, TXNIP protein levels in MKN-45 cells transfected with E2F1 siRNA-2 (si-E2F1) or E2F1 vector. \*\*\* $P < 0.001$ ; \*\* $P < 0.01$ ; \* $P < 0.05$ .

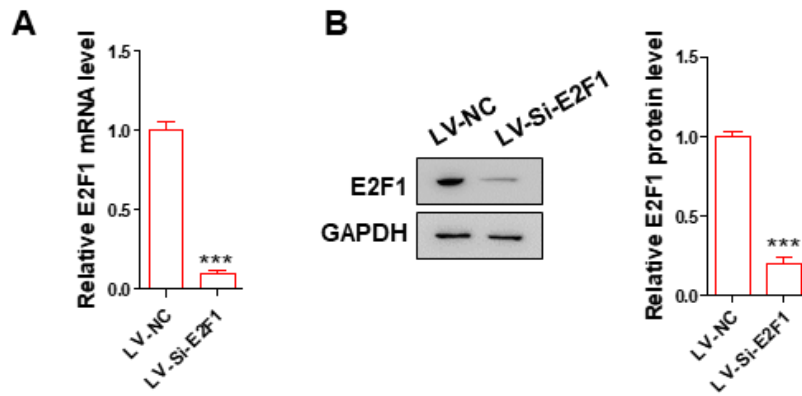

**Supplementary Fig.2 The efficiencies of si-E2F1 lentivirus.** (A) qRT-PCR analysis of E2F1 mRNA levels in MKN-45 cells infected with control lentivirus and si-E2F1 lentivirus. (B) Western blotting analysis of E2F1 protein levels in MKN-45 cells infected with control lentivirus and si-E2F1 lentivirus. GAPDH served as the loading control. \*\*\* $P < 0.001$ .

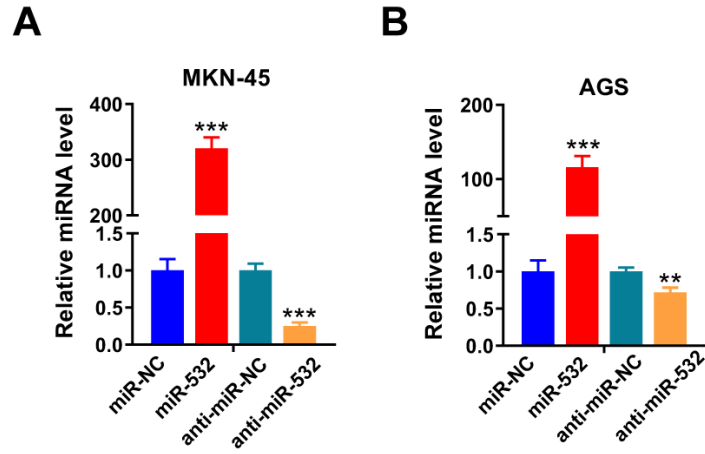

**Supplementary Fig. 3 Analysis of the efficiency of miRNA mimics and inhibitors. (A, B)** qRT-PCR analysis of miR-532 expression levels in MKN-45 and AGS cells after transfection with miR-532 mimics or inhibitors. U6 served as the internal reference. \*\*\* $P < 0.001$ ; \*\* $P < 0.01$ .

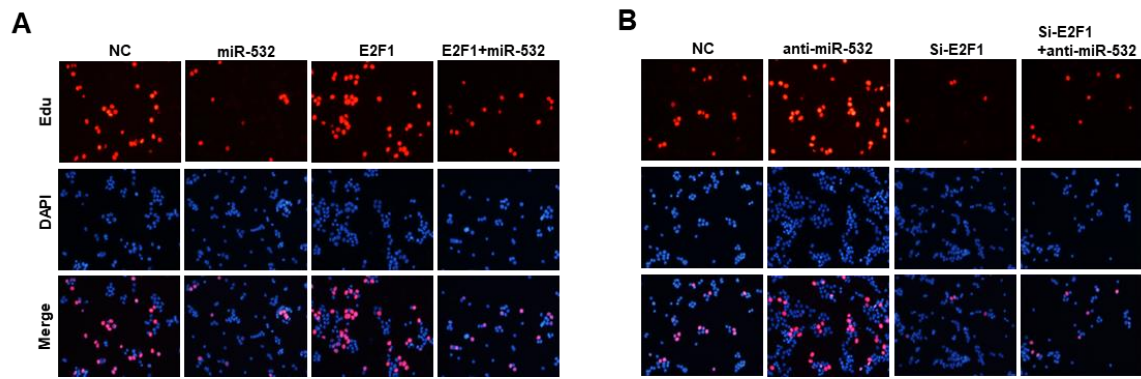

**Supplementary Fig.4 The effects of miR-532 on GC cell proliferation.** MKN-45 cells were transfected with NC, miR-532 mimics, E2F1 overexpressing plasmids or miR-532 mimics plus E2F1 overexpressing plasmids (A), or miR-532 inhibitors, E2F1 siRNA, E2F1 siRNA plus miR-532 inhibitors(B), respectively. EdU assay detected the cell proliferation.

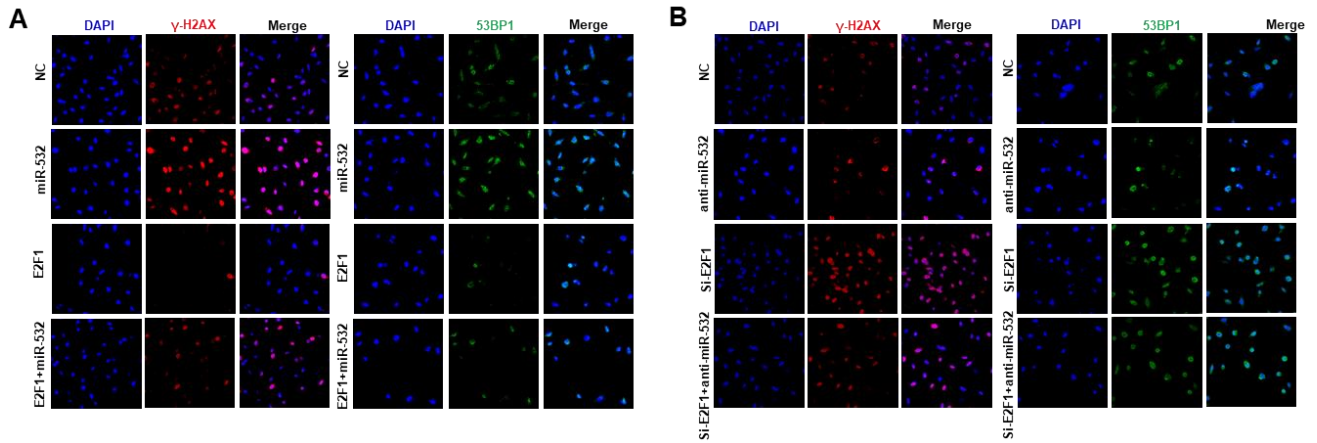

**Supplementary Fig.5 MiR-532 promotes DNA damage by suppressing E2F1 in GC cells.**

Immunofluorescence analysis of DNA damage of MKN-45 cells transfected with NC, miR-532 mimics, E2F1 overexpressing plasmids or miR-532 mimics plus E2F1 overexpressing plasmids (A), or miR-532 inhibitors, E2F1 siRNA, E2F1 siRNA plus miR-532 inhibitors(B), respectively.

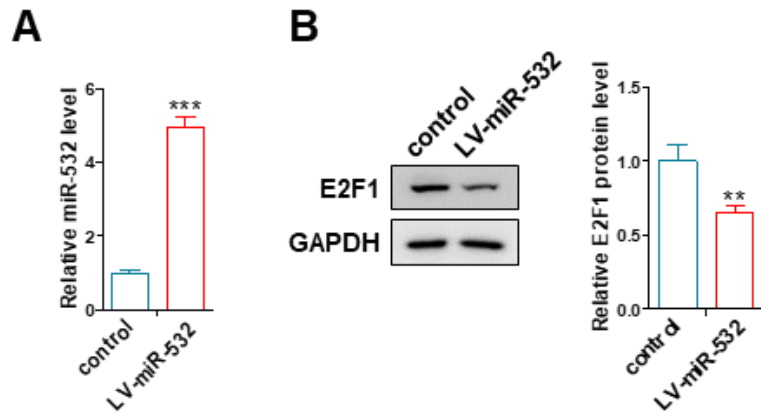

**Supplementary Fig.6 Upregulation of miR-532 and downregulation of E2F1 by lentiviral expression vectors of miR-532 in MKN-45 cells. (A)** qRT-PCR analysis of miR-532 expression levels in MKN-45cells infected with miR-532 lentivirus. U6 served as the internal reference. **(B)** Western blotting analysis of E2F1 protein levels in MKN-45cells infected with miR-532 lentivirus. \*\*\* $P < 0.001$ ; \*\* $P < 0.01$ .

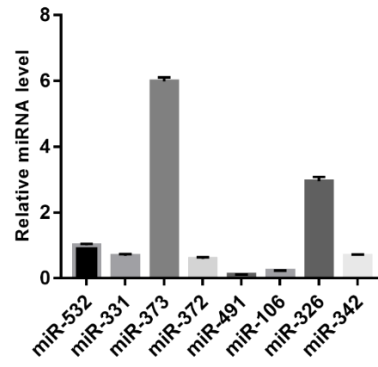

**Supplementary Fig.7 RT-PCR analysis of the eight miRNAs' basic expression levels in MKN-45 cells.**
